# Supplementary material for: Variety-driven rhizosphere microbiome bestows differential salt tolerance to alfalfa for coping with salinity stress
Source: Frontiers journal article supplement (doi:10.3389/fpls.2023.1324333), 2023-12-11
Supplement: Data_Sheet_1.PDF [file Data_Sheet_1.PDF]

## *Supplementary Material*

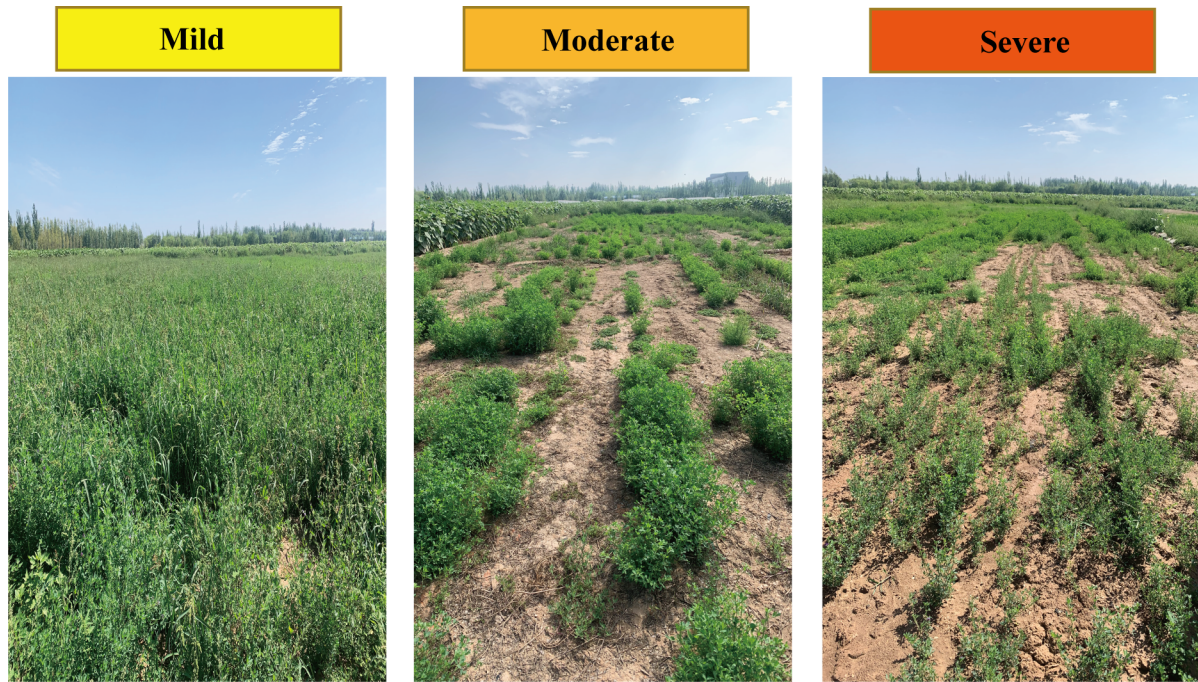

**Supplementary Figure 1.** Growth performance of alfalfa in soils with varied degrees of saline-alkali soil.

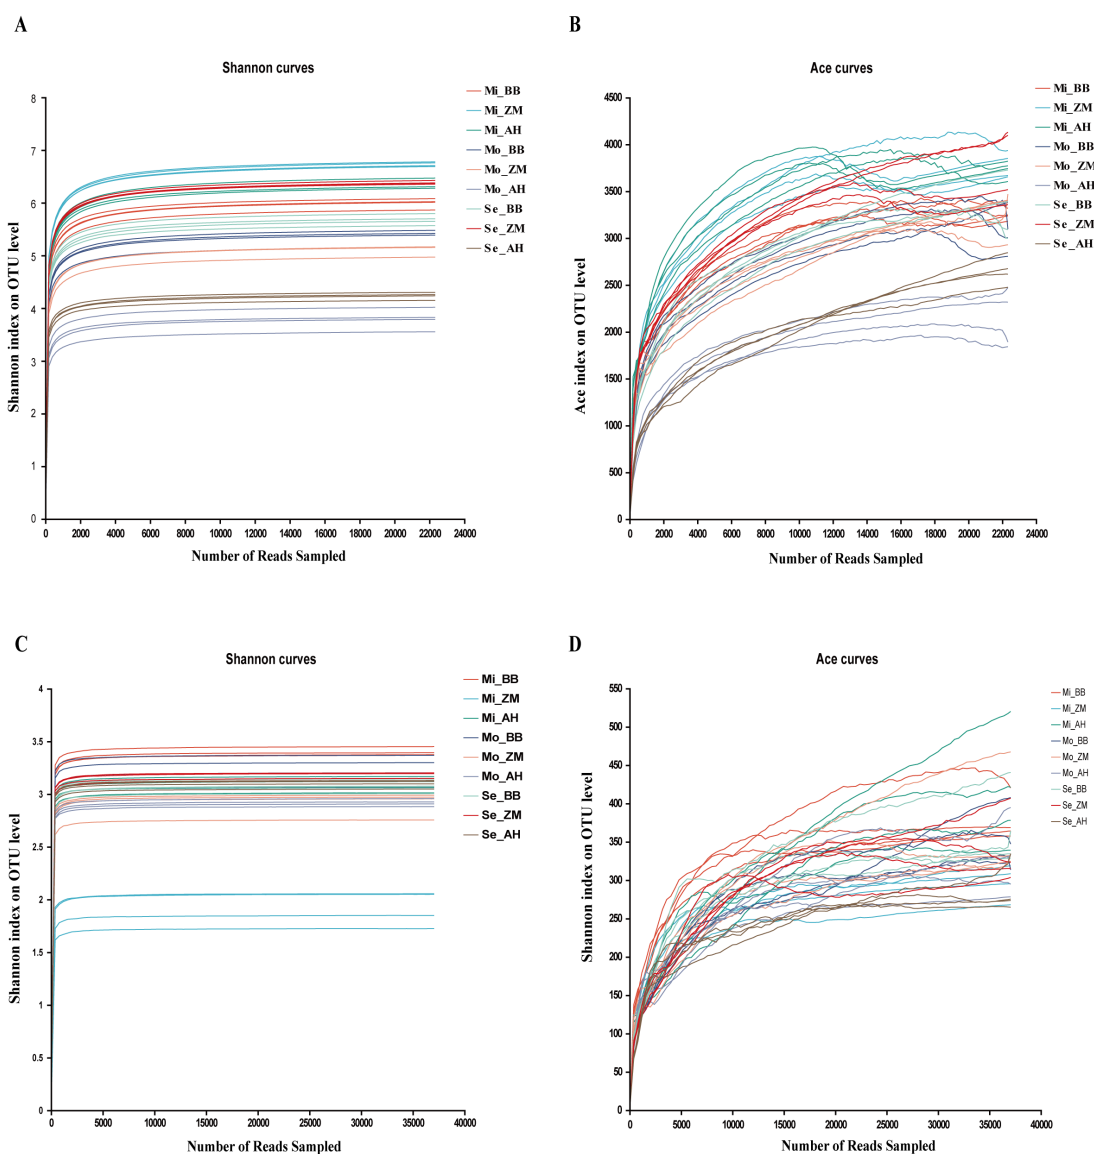

**Supplementary Figure 2.** Rarefaction curves. **(A)** Rarefaction curve of bacterial Shannon index, **(B)** Rarefaction curve of bacterial Ace index, **(C)** Rarefaction curve of fungal Shannon index, **(D)** Rarefaction curve of fungal Ace index.

**A**

# **Bacterial community $\alpha$ -diversity**

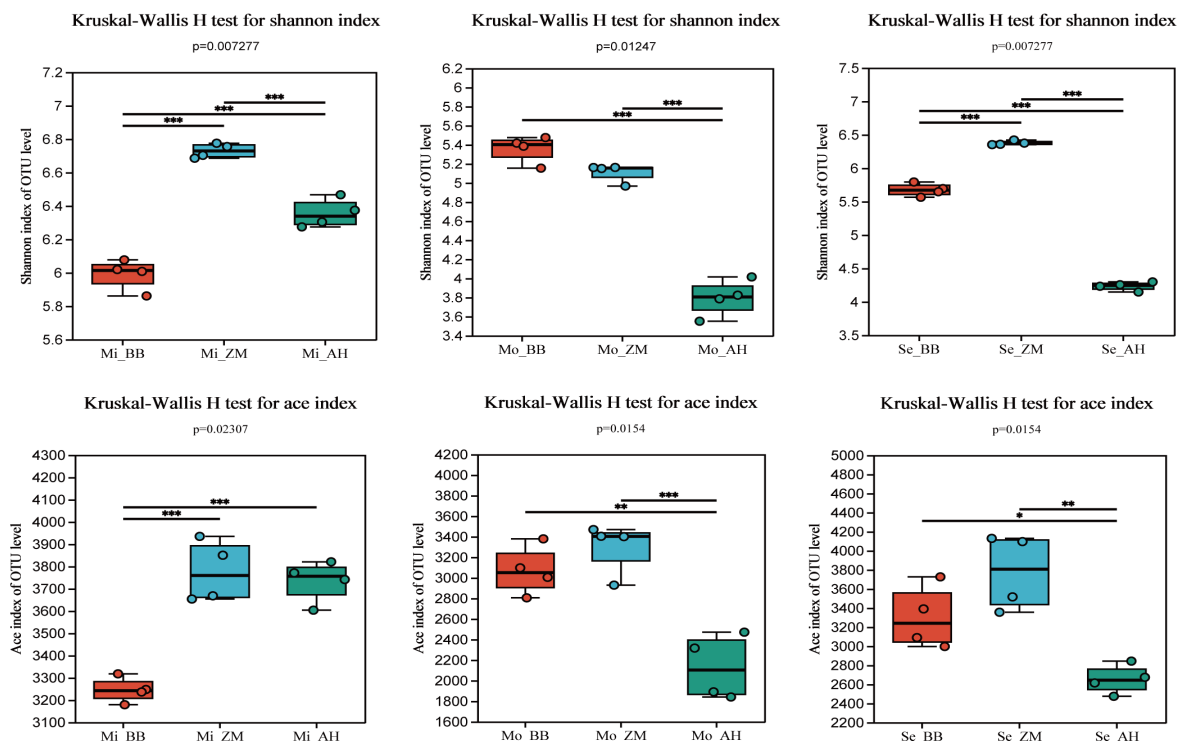

**B**

# **Fungi community $\alpha$ -diversity**

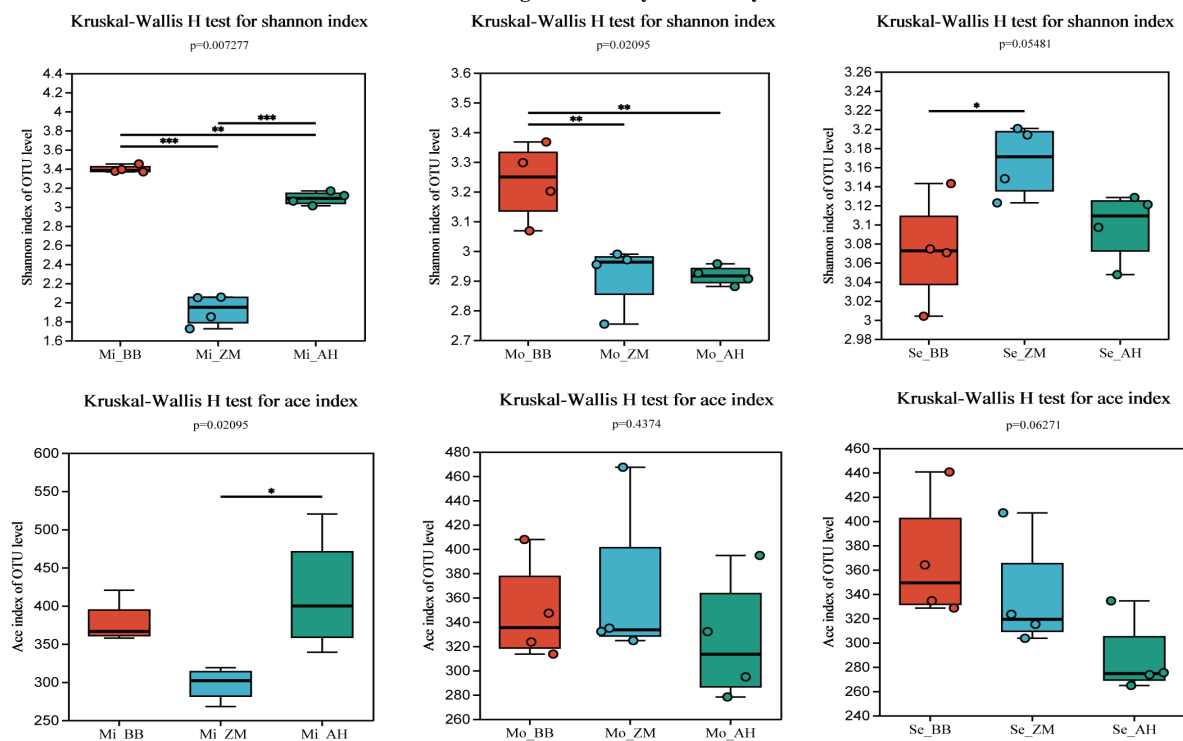

**Supplementary Figure 3.** Analysis of inter-group differences in Shannon and Ace indices of bacteria and fungi. **(A)** Differential analysis of bacterial Shannon and Ace indices, **(B)** Differential analysis of fungal Shannon and Ace indices.

A

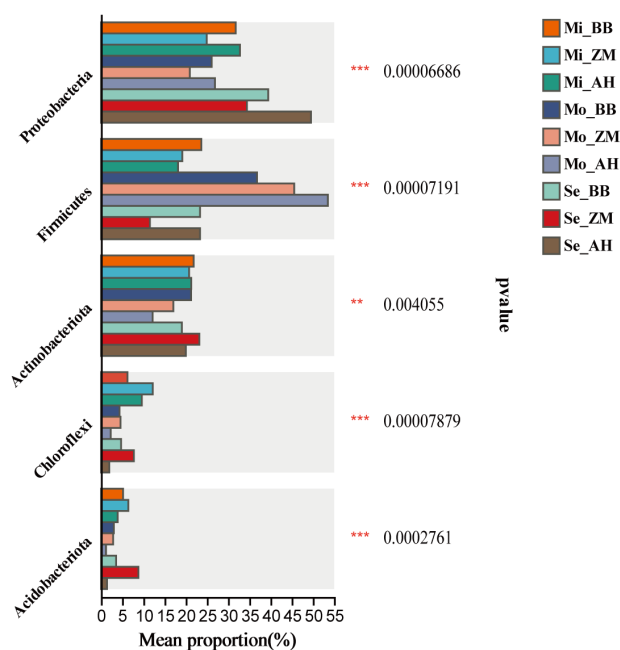

B

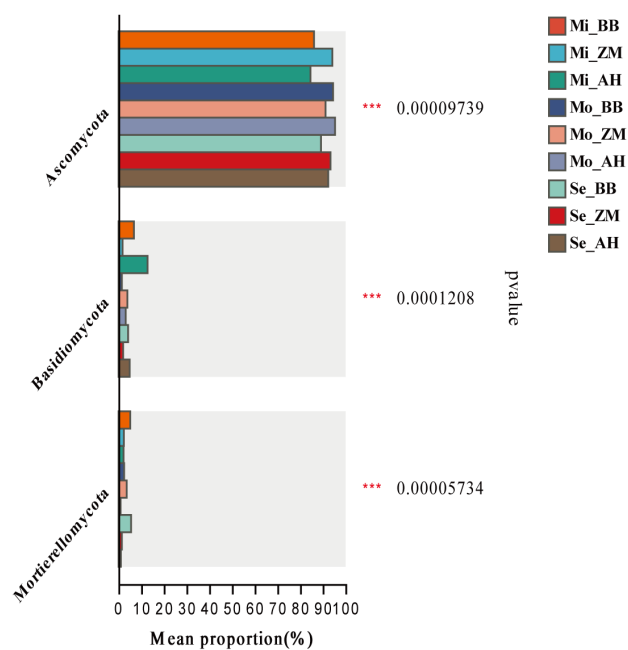

**Supplementary Figure 4.** Differential significance testing of variations in the main species composition of rhizosphere microbial communities at the phylum level among different alfalfa varieties in different degrees of saline-alkali soil. **(A)** Differential testing at the bacterial phylum level, **(B)** Differential testing at the fungal phylum level.

**A**

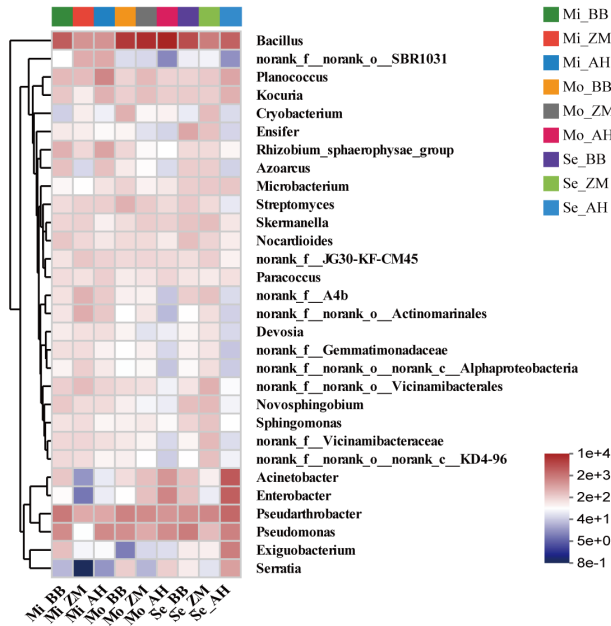

**B**

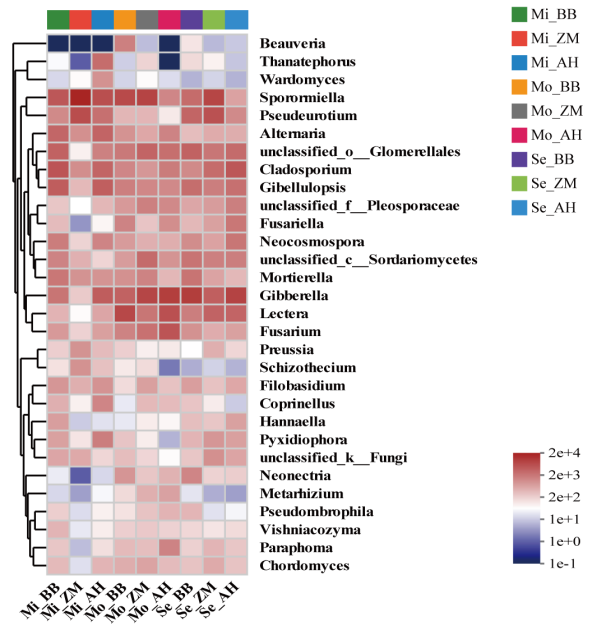

**Supplementary Figure 5.** A heat map clustering shows the average relative abundance of the top 30 genera of all samples, **(A)** The top 30 genera of bacteria, **(B)** The top 30 genera of fungi.

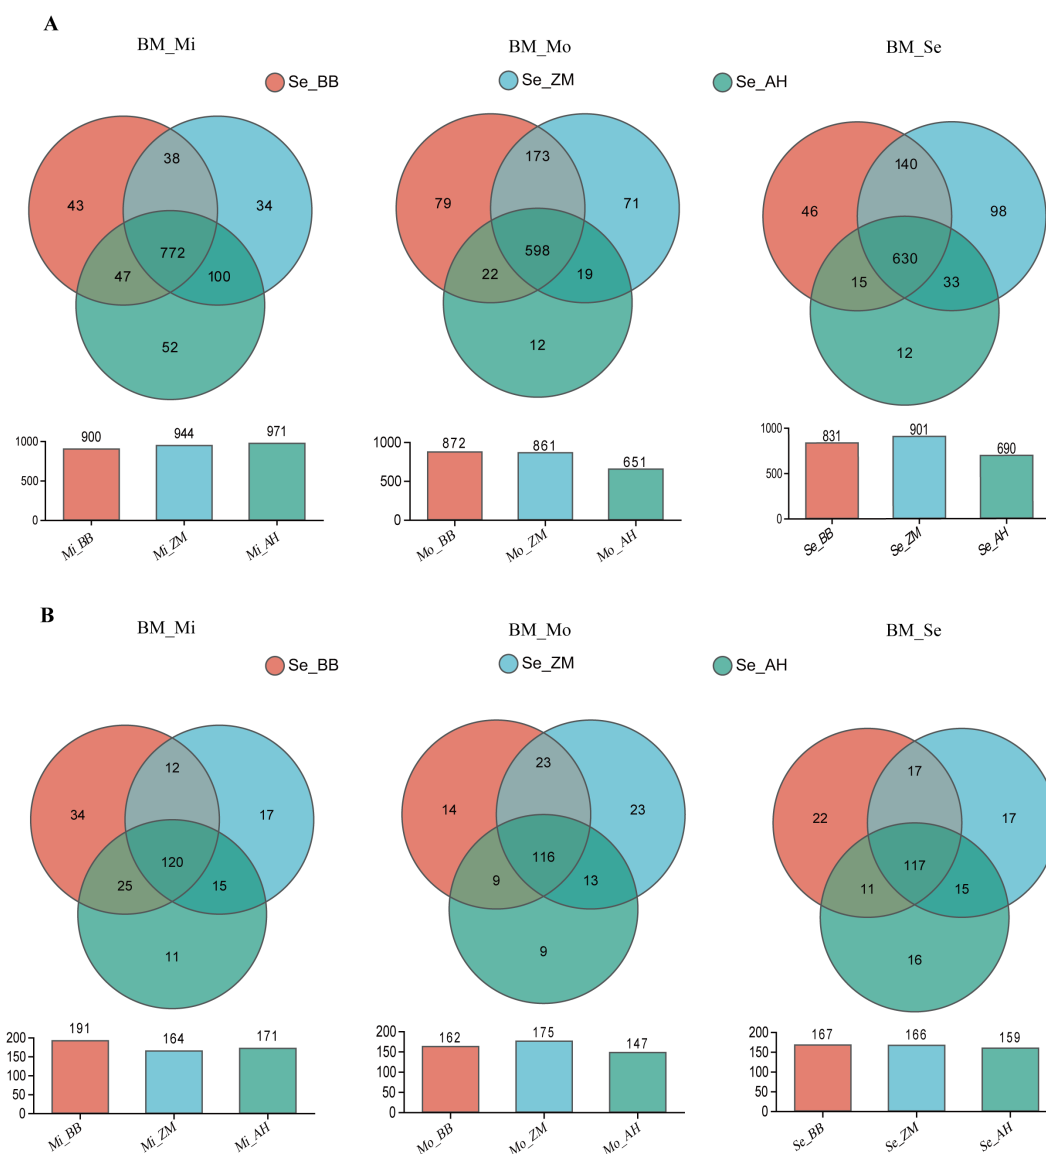

**Supplementary Figure 6.** Visualization of common and unique microbial genera in the rhizosphere of different varieties in saline-alkaline soil. **(A)** Bacteria, **(B)** Fungi.

**Table S1.** Bacteria and fungi  $\alpha$ -diversity index

| Sample group | Bacteria |         |         |         | Fungi   |         |        |        |
|--------------|----------|---------|---------|---------|---------|---------|--------|--------|
|              | Shannon  | Simpson | Ace     | Chao1   | Shannon | Simpson | Ace    | Chao1  |
| Mi_BB        | 5.99     | 0.01    | 3245.21 | 3173.65 | 3.40    | 0.06    | 377.56 | 371.52 |
| Mi_ZM        | 6.73     | 0       | 3776.76 | 3696.61 | 1.92    | 0.36    | 297.58 | 297.92 |
| Mi_AH        | 6.35     | 0.01    | 3734.2  | 3650.07 | 3.09    | 0.08    | 414.58 | 341.95 |
| Mo_BB        | 5.36     | 0.02    | 3071.4  | 2947.03 | 3.23    | 0.08    | 347.94 | 342.67 |
| Mo_ZM        | 5.11     | 0.05    | 3300.63 | 2898.17 | 2.92    | 0.12    | 364.67 | 327.69 |
| Mo_AH        | 3.79     | 0.15    | 2129.57 | 1919.4  | 2.92    | 0.11    | 324.85 | 289.54 |
| Se_BB        | 5.67     | 0.01    | 3300.95 | 2961.7  | 3.07    | 0.10    | 366.80 | 331.27 |
| Se_ZM        | 6.38     | 0.01    | 3774.5  | 3458.11 | 3.17    | 0.08    | 337.15 | 324.99 |
| Se_AH        | 4.23     | 0.05    | 2651.97 | 2114.66 | 3.10    | 0.09    | 286.95 | 272.78 |
